# Supplementary material for: Ca18Na3Y(PO4)14:Eu2+,Mn2+: a novel single-phase dual-emission phosphor and its spectral modulation by Mg2+ for plant lighting and WLEDs
Source: Royal Society of Chemistry journal article supplement (doi:10.1039/d4tc01527d), 2024-01-01
Supplement: d4tc01527d1.pdf [file d4tc01527d1.pdf]

## Supporting Information

**Ca<sub>18</sub>Na<sub>3</sub>Y(PO<sub>4</sub>)<sub>14</sub>:Eu<sup>2+</sup>,Mn<sup>2+</sup>: A Novel Single-Phase Dual-Emission**

**Phosphor and Its Spectral Modulation by Mg<sup>2+</sup> for Plant Lighting and**

**WLEDs**

Zhibin Ye <sup>a</sup>, Ziwang Zhang <sup>b</sup>, Nan Yang <sup>a</sup>, Zhuo Li <sup>a</sup>, Weijie Huang <sup>a</sup> and Jianxin Shi<sup>\*,a</sup>

<sup>a</sup>*School of Chemistry, IGCME, Sun Yat-Sen University, Guangzhou 510006, P. R. China.*

<sup>b</sup>*School of Materials, Sun Yat-Sen University, Shenzhen 518107, P. R. China.*

\* Corresponding author: [cessjx@mail.sysu.edu.cn](mailto:cessjx@mail.sysu.edu.cn).

## Table of contents

|                                                                                                                                                                                                                                                  |    |
|--------------------------------------------------------------------------------------------------------------------------------------------------------------------------------------------------------------------------------------------------|----|
| <b>Fig. S1</b> The XRD patterns of (a) CNYPO: $x\text{Eu}^{2+}$ , (b) CNYPO: $y\text{Mn}^{2+}$ , (c) CNYPO: $0.18\text{Eu}^{2+},y\text{Mn}^{2+}$ , and (d) CNYPO: $0.18\text{Eu}^{2+},0.18\text{Mn}^{2+},z\text{Mg}^{2+}$ .....                  | 1  |
| <b>Fig. S2</b> The XRD pattern and Rietveld refinement of CNYPO host. ....                                                                                                                                                                       | 2  |
| <b>Table S1.</b> The crystallographic parameters, atomic coordinates and site occupancies of CNYPO host. ....                                                                                                                                    | 3  |
| <b>Table S2.</b> The crystallographic parameters, atomic coordinates and site occupancies of CNYPO: $0.18\text{Eu}^{2+},0.18\text{Mn}^{2+}$ .....                                                                                                | 4  |
| <b>Fig. S3</b> The EDS of (a) CNYPO: $0.18\text{Eu}^{2+},0.18\text{Mn}^{2+}$ and (b) CNYPO: $0.18\text{Eu}^{2+},0.18\text{Mn}^{2+},2.88\text{Mg}^{2+}$ .....                                                                                     | 5  |
| <b>Fig. S4</b> The relationship between $\log(I/x)$ and $\log(x)$ of CNYPO: $x\text{Eu}^{2+}$ .....                                                                                                                                              | 6  |
| <b>Fig. S5</b> PLE and PL spectra of CNYPO: $y\text{Mn}^{2+}$ (the inset shows the emission intensity at 650 nm for variable concentration of $\text{Mn}^{2+}$ ) .....                                                                           | 7  |
| <b>Fig. S6</b> IQE of CNYPO: $0.18\text{Eu}^{2+},0.18\text{Mn}^{2+}$ under the excitation of 340 nm. ....                                                                                                                                        | 8  |
| <b>Fig. S7</b> The XRD pattern and Rietveld refinement of CNYPO: $0.18\text{Eu}^{2+},0.72\text{Mn}^{2+}$ .....                                                                                                                                   | 9  |
| <b>Table S3.</b> The refined cell parameters of CNYPO: $0.18\text{Eu}^{2+},0.72\text{Mn}^{2+}$ .....                                                                                                                                             | 9  |
| <b>Fig. S8</b> (a) The Inokuti-Hirayama fitting curves and (d) the linear fitting curve of $\ln[-\ln(I/I_0)-t/\tau_0]$ to $\ln(t)$ of CNYPO: $0.18\text{Eu}^{2+},0.18\text{Mn}^{2+}$ .....                                                       | 10 |
| <b>Table S4.</b> The bond length of the Ca sites occupied by $\text{Eu}^{2+}$ in CNYPO: $0.18\text{Eu}^{2+},0.18\text{Mn}^{2+}$ and CNYPO: $0.18\text{Eu}^{2+},0.18\text{Mn}^{2+},2.88\text{Mg}^{2+}$ calculated by XRD refinement results. .... | 11 |
| <b>Fig. S9</b> Current-dependent EL spectra of the LED devices fabricated by (a) CNYPO: $0.18\text{Eu}^{2+},0.18\text{Mn}^{2+}$ and (b) CNYPO: $0.18\text{Eu}^{2+},0.18\text{Mn}^{2+},2.16\text{Mg}^{2+}$ with 365 nm chips, respectively. ....  | 12 |
| <b>Fig. S10</b> CIE coordinates of the LED devices fabricated by (a) CNYPO: $0.18\text{Eu}^{2+},0.18\text{Mn}^{2+}$ and (b) CNYPO: $0.18\text{Eu}^{2+},0.18\text{Mn}^{2+},2.16\text{Mg}^{2+}$ with 365 nm chips, respectively. ....              | 12 |
| <b>References</b> .....                                                                                                                                                                                                                          | 13 |

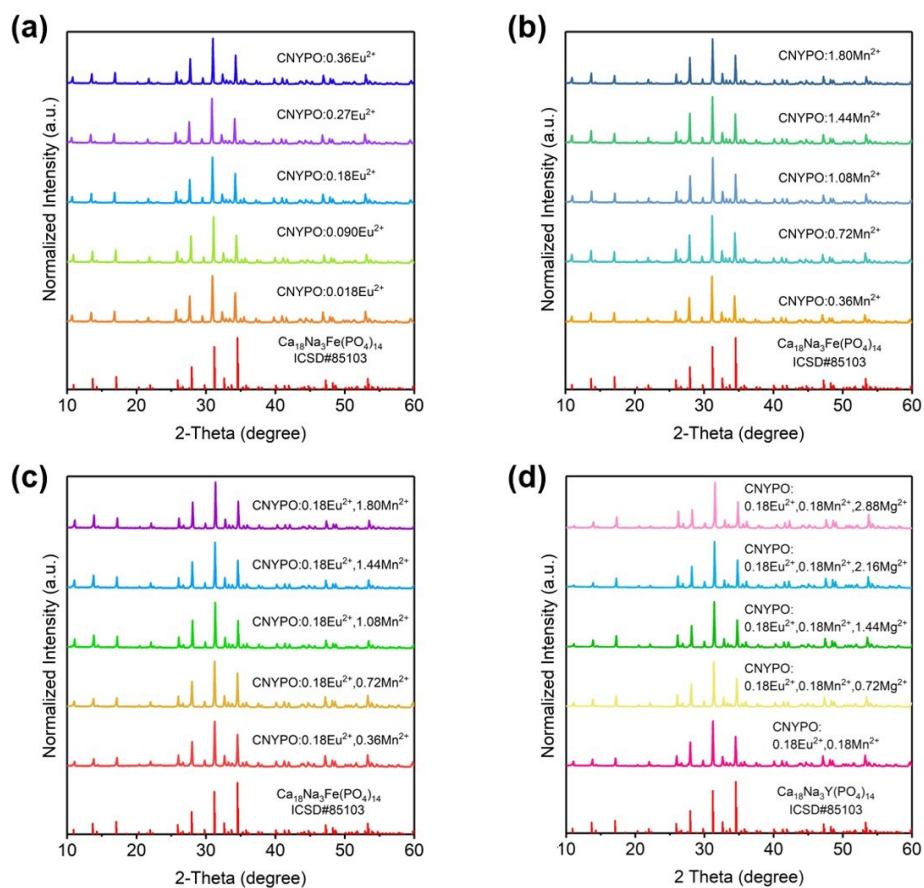

**Fig. S1** The XRD patterns of (a)  $\text{CNYPO}:x\text{Eu}^{2+}$ , (b)  $\text{CNYPO}:y\text{Mn}^{2+}$ , (c)  $\text{CNYPO}:0.18\text{Eu}^{2+},y\text{Mn}^{2+}$ , and (d)  $\text{CNYPO}:0.18\text{Eu}^{2+},0.18\text{Mn}^{2+},z\text{Mg}^{2+}$ .

It is clear from all the XRD patterns that there are no additional reflections, indicating that the introduction of dopant ions does not produce impurity phase.

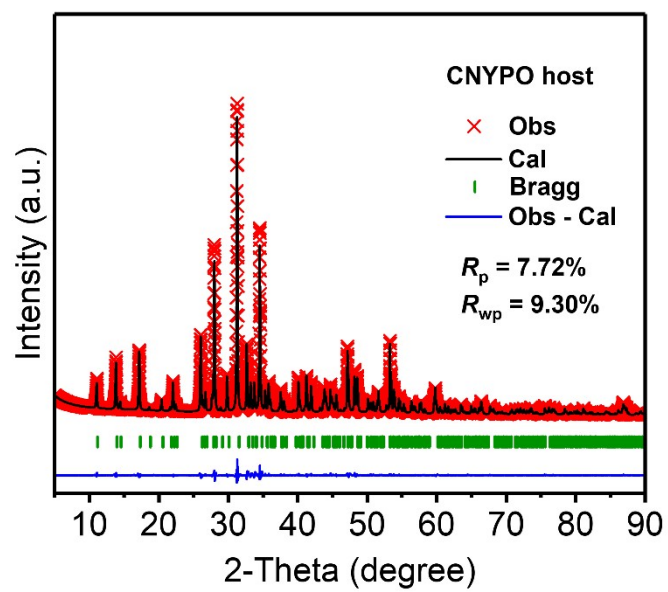

Fig. S2 The XRD pattern and Rietveld refinement of CNYPO host.

**Table S1.** The crystallographic parameters, atomic coordinates and site occupancies of CNYPO host.

| Space group         |             | <i>R3c</i> (No.161)                                                                                                                               |          |          |          |                          |
|---------------------|-------------|---------------------------------------------------------------------------------------------------------------------------------------------------|----------|----------|----------|--------------------------|
| Cell parameters     |             | $a = b = 10.4499 \text{ \AA}, c = 37.3199 \text{ \AA}$<br>$\alpha = \beta = 90^\circ, \gamma = 120^\circ$<br>$V = 3529.3351 \text{ \AA}^3, Z = 3$ |          |          |          |                          |
| Reliability factors |             | $R_p = 7.72\%, R_{wp} = 9.30\%$                                                                                                                   |          |          |          |                          |
| Atom                | Site        | Occup.                                                                                                                                            | <i>x</i> | <i>y</i> | <i>z</i> | $U_{iso} (\text{\AA}^2)$ |
| Ca1                 | 18 <i>b</i> | 1                                                                                                                                                 | 0.72871  | 0.85455  | 0.43422  | 0.0187                   |
| Ca2                 | 18 <i>b</i> | 1                                                                                                                                                 | 0.62025  | 0.82529  | 0.23435  | 0.0224                   |
| Ca3                 | 18 <i>b</i> | 0.833                                                                                                                                             | 0.12307  | 0.26564  | 0.32733  | 0.0242                   |
| Na1                 | 18 <i>b</i> | 0.167                                                                                                                                             | 0.12307  | 0.26564  | 0.32733  | 0.0242                   |
| Na2                 | 6 <i>a</i>  | 1                                                                                                                                                 | 0        | 0        | 0.18015  | 0.0795                   |
| Ca4                 | 6 <i>a</i>  | 0.5                                                                                                                                               | 0        | 0        | 0.00726  | 0.0324                   |
| Y1                  | 6 <i>a</i>  | 0.5                                                                                                                                               | 0        | 0        | 0.00726  | 0.0324                   |
| P1                  | 6 <i>a</i>  | 1                                                                                                                                                 | 0        | 0        | 0.27164  | 0.0431                   |
| P2                  | 18 <i>b</i> | 1                                                                                                                                                 | 0.69433  | 0.87699  | 0.13771  | 0.0315                   |
| P3                  | 18 <i>b</i> | 1                                                                                                                                                 | 0.64805  | 0.83769  | 0.03825  | 0.0289                   |
| O1                  | 6 <i>a</i>  | 1                                                                                                                                                 | 0        | 0        | 0.30055  | 0.0127                   |
| O2                  | 18 <i>b</i> | 1                                                                                                                                                 | 0.01008  | 0.86421  | 0.25445  | 0.0376                   |
| O3                  | 18 <i>b</i> | 1                                                                                                                                                 | 0.73615  | 0.90838  | 0.17248  | 0.0317                   |
| O4                  | 18 <i>b</i> | 1                                                                                                                                                 | 0.75465  | 0.75279  | 0.12316  | 0.0436                   |
| O5                  | 18 <i>b</i> | 1                                                                                                                                                 | 0.74089  | 0.01686  | 0.11379  | 0.0318                   |
| O6                  | 18 <i>b</i> | 1                                                                                                                                                 | 0.5052   | 0.78947  | 0.11982  | 0.0265                   |
| O7                  | 18 <i>b</i> | 1                                                                                                                                                 | 0.60293  | 0.96018  | 0.04587  | 0.0267                   |
| O8                  | 18 <i>b</i> | 1                                                                                                                                                 | 0.56893  | 0.67537  | 0.04982  | 0.0144                   |
| O9                  | 18 <i>b</i> | 1                                                                                                                                                 | 0.81524  | 0.90548  | 0.04386  | 0.0162                   |
| O10                 | 18 <i>b</i> | 1                                                                                                                                                 | 0.64601  | 0.85494  | 0.99004  | 0.0268                   |

**Table S2.** The crystallographic parameters, atomic coordinates and site occupancies of  
CNYPO:0.18Eu<sup>2+</sup>,0.18Mn<sup>2+</sup>.

| Space group         |             | <i>R3c</i> (No.161)                                                                                                                               |          |          |          |                          |
|---------------------|-------------|---------------------------------------------------------------------------------------------------------------------------------------------------|----------|----------|----------|--------------------------|
| Cell parameters     |             | $a = b = 10.4452 \text{ \AA}, c = 37.3279 \text{ \AA}$<br>$\alpha = \beta = 90^\circ, \gamma = 120^\circ$<br>$V = 3527.3351 \text{ \AA}^3, Z = 3$ |          |          |          |                          |
| Reliability factors |             | $R_p = 8.54\%, R_{wp} = 6.09\%$                                                                                                                   |          |          |          |                          |
| Atom                | Site        | Occup.                                                                                                                                            | <i>x</i> | <i>y</i> | <i>z</i> | $U_{iso} (\text{\AA}^2)$ |
| Ca1                 | 18 <i>b</i> | 1                                                                                                                                                 | 0.72486  | 0.85217  | 0.43396  | 0.0083                   |
| Ca2                 | 18 <i>b</i> | 1                                                                                                                                                 | 0.61892  | 0.81956  | 0.23405  | 0.0064                   |
| Ca3                 | 18 <i>b</i> | 0.833                                                                                                                                             | 0.12457  | 0.26769  | 0.32839  | 0.0071                   |
| Na1                 | 18 <i>b</i> | 0.167                                                                                                                                             | 0.12457  | 0.26769  | 0.32839  | 0.0071                   |
| Na2                 | 6 <i>a</i>  | 1                                                                                                                                                 | 0        | 0        | 0.18134  | 0.0836                   |
| Ca4                 | 6 <i>a</i>  | 0.5                                                                                                                                               | 0        | 0        | 0.00231  | 0.0224                   |
| Y1                  | 6 <i>a</i>  | 0.5                                                                                                                                               | 0        | 0        | 0.00231  | 0.0224                   |
| P1                  | 6 <i>a</i>  | 1                                                                                                                                                 | 0        | 0        | 0.26829  | 0.0195                   |
| P2                  | 18 <i>b</i> | 1                                                                                                                                                 | 0.6892   | 0.87271  | 0.1362   | 0.0110                   |
| P3                  | 18 <i>b</i> | 1                                                                                                                                                 | 0.65118  | 0.83333  | 0.03449  | 0.0214                   |
| O1                  | 6 <i>a</i>  | 1                                                                                                                                                 | 0        | 0        | 0.30547  | 0.0082                   |
| O2                  | 18 <i>b</i> | 1                                                                                                                                                 | 0.01347  | 0.86686  | 0.24778  | 0.0294                   |
| O3                  | 18 <i>b</i> | 1                                                                                                                                                 | 0.7427   | 0.8977   | 0.17342  | 0.0272                   |
| O4                  | 18 <i>b</i> | 1                                                                                                                                                 | 0.76233  | 0.76042  | 0.12376  | 0.0231                   |
| O5                  | 18 <i>b</i> | 1                                                                                                                                                 | 0.74061  | 0.01704  | 0.1133   | 0.0244                   |
| O6                  | 18 <i>b</i> | 1                                                                                                                                                 | 0.50868  | 0.76687  | 0.12427  | 0.0219                   |
| O7                  | 18 <i>b</i> | 1                                                                                                                                                 | 0.59962  | 0.95756  | 0.04648  | 0.0208                   |
| O8                  | 18 <i>b</i> | 1                                                                                                                                                 | 0.56996  | 0.67882  | 0.04704  | 0.0120                   |
| O9                  | 18 <i>b</i> | 1                                                                                                                                                 | 0.81891  | 0.92155  | 0.04189  | 0.0124                   |
| O10                 | 18 <i>b</i> | 1                                                                                                                                                 | 0.63881  | 0.83816  | 0.98915  | 0.0185                   |

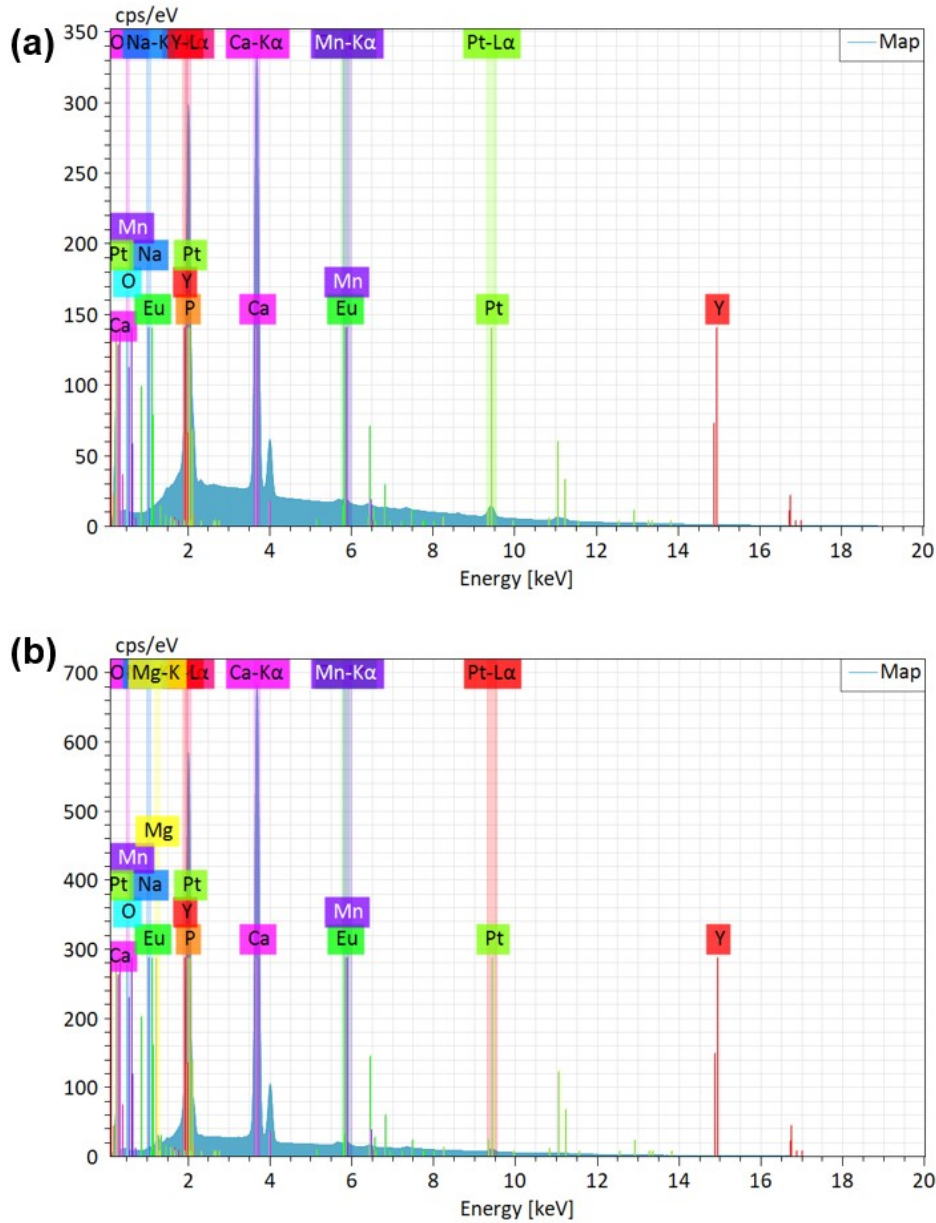

**Fig. S3** The EDS of (a) CNYPO:0.18Eu<sup>2+</sup>,0.18Mn<sup>2+</sup> and (b) CNYPO:0.18Eu<sup>2+</sup>,0.18Mn<sup>2+</sup>,2.88Mg<sup>2+</sup>.

Fig. S3 depicts the EDS of CNYPO:0.18Eu<sup>2+</sup>,0.18Mn<sup>2+</sup> and CNYPO:0.18Eu<sup>2+</sup>,0.18Mn<sup>2+</sup>,2.88Mg<sup>2+</sup>. It is clear that Eu<sup>2+</sup>, Mn<sup>2+</sup> and Mg<sup>2+</sup> have been doped into the CNYPO host successfully. Pt is detected in the result due to the fact that Pt is used as a conductive coating introduced by low vacuum sputter coating so that the contrast can be improved.

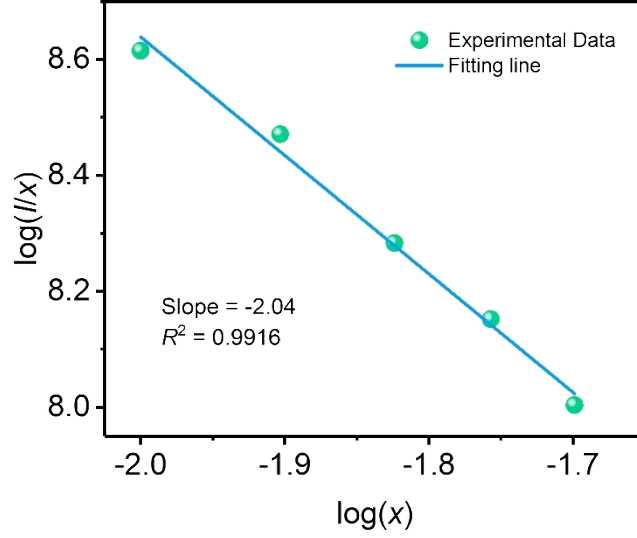

**Fig. S4** The relationship between  $\log(I/x)$  and  $\log(x)$  of CNYPO: $x\text{Eu}^{2+}$

The concentration quenching is usually dominated by exchange interaction or electric multipolar interaction.<sup>1</sup> The interaction in CNYPO: $x\text{Eu}^{2+}$  may be determined by the critical distance ( $R_C$ ) of  $\text{Eu}^{2+}$  in CNYPO host, given by the equation:<sup>2</sup>

$$R_C = 2 \left( \frac{3V}{4\pi x_C N} \right)^{\frac{1}{3}} \quad (1)$$

where  $V$  is the volume of the unit cell,  $x_C$  is the concentration of  $\text{Eu}^{2+}$  when the concentration quenching occurs, and  $N$  is the number of  $\text{Ca}^{2+}$  ions in the unit cell. For CNYPO: $0.18\text{Eu}^{2+}$ ,  $V = 3529.3351 \text{ \AA}^3$ ,  $x_C = 0.01$ ,  $N = 54$ . As a result,  $R_C$  is calculated to be  $22.64 \text{ \AA}$ , which is larger than  $5 \text{ \AA}$ . Hence, the concentration quenching effect of  $\text{Eu}^{2+}$  in CNYPO host is attributable to electric multipolar interaction. The type of electric multipolar interaction can be fitted by the Dexter equation:<sup>3</sup>

$$\log \left( \frac{I}{x} \right) = \log k - \frac{S}{d} \log(x) \quad (2)$$

where  $I$  is the emission intensity,  $d$  is the dimension of energy transfer equaling to 3, and  $S$  is the index of electric multipolar.  $S = 6, 8$  and  $10$  corresponds to dipole-dipole, dipole-quadrupole and quadrupole-quadrupole interaction, respectively. The integrated emission intensities of CNYPO: $x\text{Eu}^{2+}$  ( $x \geq x_C$ ) have been used for fitting, and the results are shown in Fig. S4. Since the slope of the fitting line is  $-2.04$ , the  $S$  equals to  $6.12$ , the



concentration quenching effect of  $\text{CNYPO}:x\text{Eu}^{2+}$  is dominated by dipole-dipole interaction.

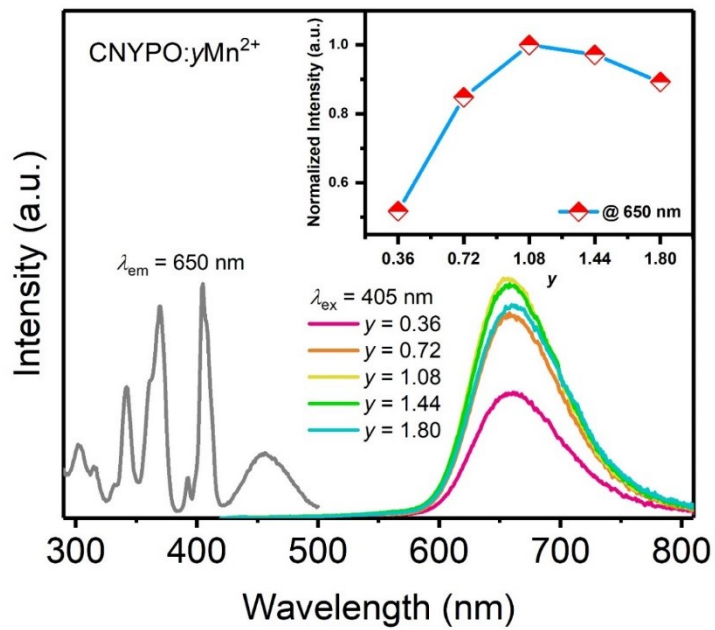

**Fig. S5** PLE and PL spectra of CNYPO:yMn<sup>2+</sup> (the inset shows the emission intensity at 650 nm for variable concentration of Mn<sup>2+</sup>).

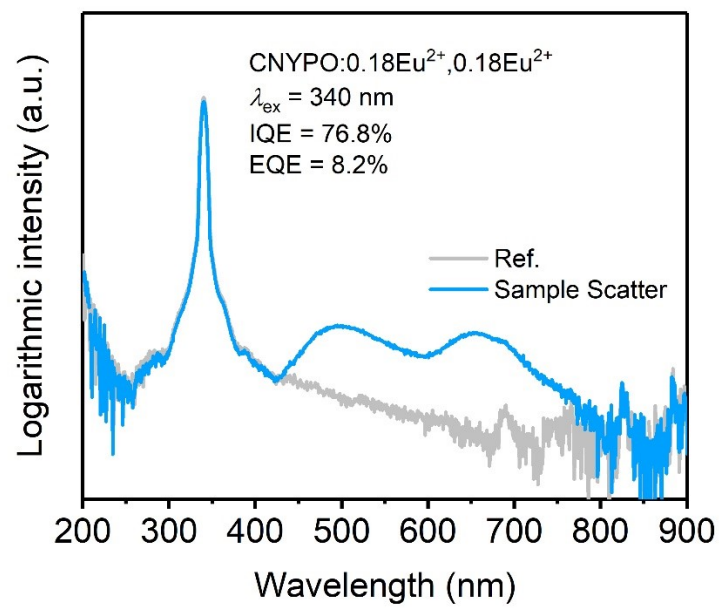

**Fig. S6** IQE of CNYPO:0.18Eu<sup>2+</sup>,0.18Mn<sup>2+</sup> under the excitation of 340 nm.

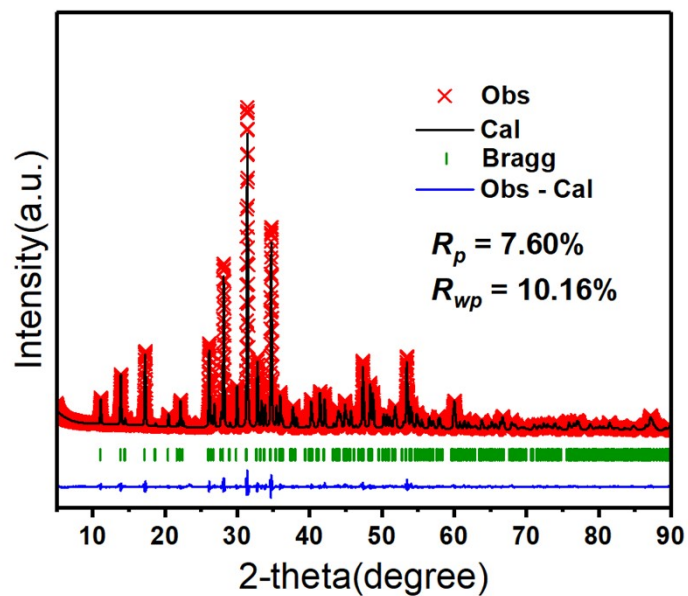

**Fig. S7** The XRD pattern and Rietveld refinement of CNYPO:0.18Eu<sup>2+</sup>,0.72Mn<sup>2+</sup>.

**Table S3.** The refined cell parameters of CNYPO:0.18Eu<sup>2+</sup>,0.72Mn<sup>2+</sup>.

|                                                  | Reliability factors                  | Cell parameters                                                                                                                                   |
|--------------------------------------------------|--------------------------------------|---------------------------------------------------------------------------------------------------------------------------------------------------|
| CNYPO:0.18Eu <sup>2+</sup> ,0.72Mn <sup>2+</sup> | $R_p = 7.60\%$<br>$R_{wp} = 10.16\%$ | $a = b = 10.4251 \text{ \AA}, c = 37.2506 \text{ \AA}$<br>$\alpha = \beta = 90^\circ, \gamma = 120^\circ$<br>$V = 3506.0730 \text{ \AA}^3, Z = 3$ |

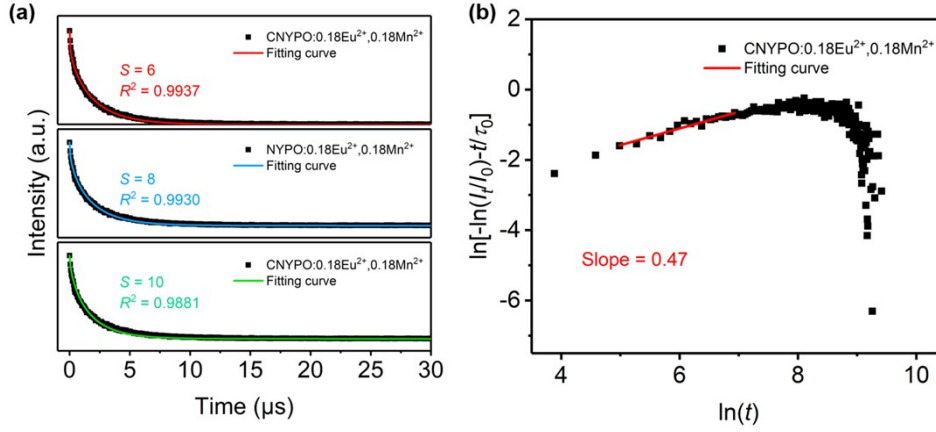

Fig. S8 (a) The Inokuti-Hirayama fitting curves and (d) the linear fitting curve of  $\ln[-\ln(I_t/I_0)-t/\tau_0]$  to  $\ln(t)$  of CNYPO:0.18Eu<sup>2+</sup>,0.18Mn<sup>2+</sup>.

The Inokuti-Hirayama modal has been used to fit the decay curve of CNYPO:0.18Eu<sup>2+</sup>,0.18Mn<sup>2+</sup>:<sup>4,5</sup>

$$I_t = I_0 \exp \left[ -\frac{t}{\tau_0} - Q \cdot t^{\frac{3}{S}} \right] \#(3)$$

$$\ln \left[ -\ln \frac{I_t}{I_0} - \frac{t}{\tau_0} \right] = A + \frac{3}{S} \ln(t) \#(4)$$

where  $I_0$  and  $I_t$  represent the luminescent intensity at  $t = 0$  and  $t$ , respectively,  $\tau_0$  is the lifetime of donors without acceptors ( 2.590 μs as shown in Fig. 4b),  $Q$  stands for the macroscopic parameter, and  $S$  is the index of electric multipolar.  $S = 6, 8$  and  $10$  corresponds to dipole-dipole, dipole-quadrupole and quadrupole-quadrupole interaction, respectively. The fitting results of each value of  $S$  are presented in Fig. S8a, the curve fitting is optimal when  $S = 6$ , indicating that dipole-dipole interaction should be the dominant energy transfer mechanism in CNYPO:Eu<sup>2+</sup>,Mn<sup>2+</sup>. As shown in Fig. S8b, the slope of the fitting line equals to 0.47, therefore,  $S = 3/0.47 = 6.38$ , which is close to 6. The result is consist with that of Eq. 3.

**Table S4.** The bond length of the Ca sites occupied by  $\text{Eu}^{2+}$  in  $\text{CNYPO}:0.18\text{Eu}^{2+},0.18\text{Mn}^{2+}$  and  $\text{CNYPO}:0.18\text{Eu}^{2+},0.18\text{Mn}^{2+},2.88\text{Mg}^{2+}$  calculated by XRD refinement results.

| Formula             | CNYPO:<br>0.18 $\text{Eu}^{2+},0.18\text{Mn}^{2+}$ | CNYPO:<br>0.18 $\text{Eu}^{2+},0.18\text{Mn}^{2+},2.88\text{Mg}^{2+}$ |
|---------------------|----------------------------------------------------|-----------------------------------------------------------------------|
| Reliability factors | $R_p = 8.54\%, R_{wp} = 6.09\%$                    | $R_p = 8.87\%, R_{wp} = 12.45\%$                                      |
| Bond                | Bond length (Å)                                    | Bond length (Å)                                                       |
| Ca1-O2              | 2.52                                               | 2.45                                                                  |
| Ca1-O5              | 2.62                                               | 2.51                                                                  |
| Ca1-O6              | 2.29                                               | 2.33                                                                  |
| Ca1-O6              | 2.41                                               | 2.52                                                                  |
| Ca1-O7              | 2.38                                               | 2.59                                                                  |
| Ca1-O8              | 2.37                                               | 2.37                                                                  |
| Ca1-O10             | 2.24                                               | 2.27                                                                  |
| Ca2-O2              | 2.30                                               | 2.10                                                                  |
| Ca2-O3              | 2.53                                               | 2.67                                                                  |
| Ca2-O4              | 2.39                                               | 2.42                                                                  |
| Ca2-O5              | 2.24                                               | 2.20                                                                  |
| Ca2-O7              | 2.69                                               | 2.64                                                                  |
| Ca2-O8              | 2.77                                               | 2.41                                                                  |
| Ca2-O9              | 2.43                                               | 2.38                                                                  |
| Ca2-O9              | 2.50                                               | 2.46                                                                  |
| Ca3-O1              | 2.56                                               | 2.79                                                                  |
| Ca3-O3              | 2.48                                               | 2.73                                                                  |
| Ca3-O4              | 2.36                                               | 2.50                                                                  |
| Ca3-O5              | 2.42                                               | 2.47                                                                  |
| Ca3-O7              | 2.36                                               | 2.14                                                                  |
| Ca3-O8              | 2.44                                               | 2.33                                                                  |
| Ca3-O10             | 2.68                                               | 2.63                                                                  |
| Ca3-O10             | 2.57                                               | 2.63                                                                  |

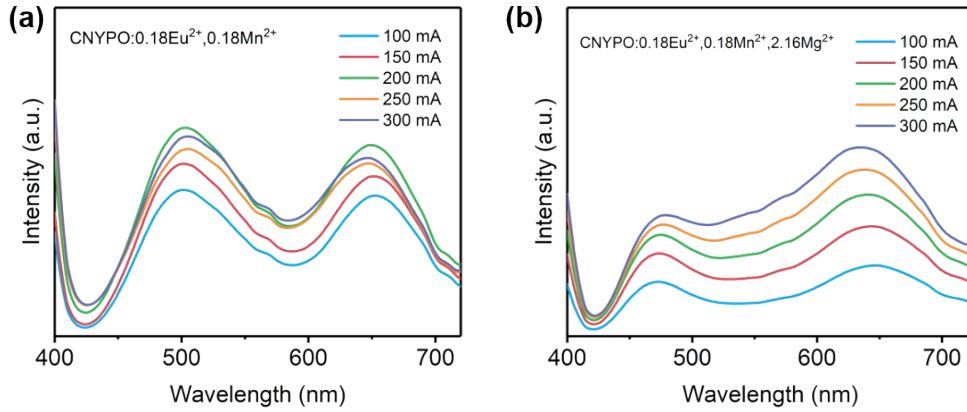

**Fig. S9** Current-dependent EL spectra of the LED devices fabricated by (a) CNYPO:0.18Eu<sup>2+</sup>,0.18Mn<sup>2+</sup> and (b) CNYPO:0.18Eu<sup>2+</sup>,0.18Mn<sup>2+</sup>,2.16Mg<sup>2+</sup> with 365 nm chips, respectively.

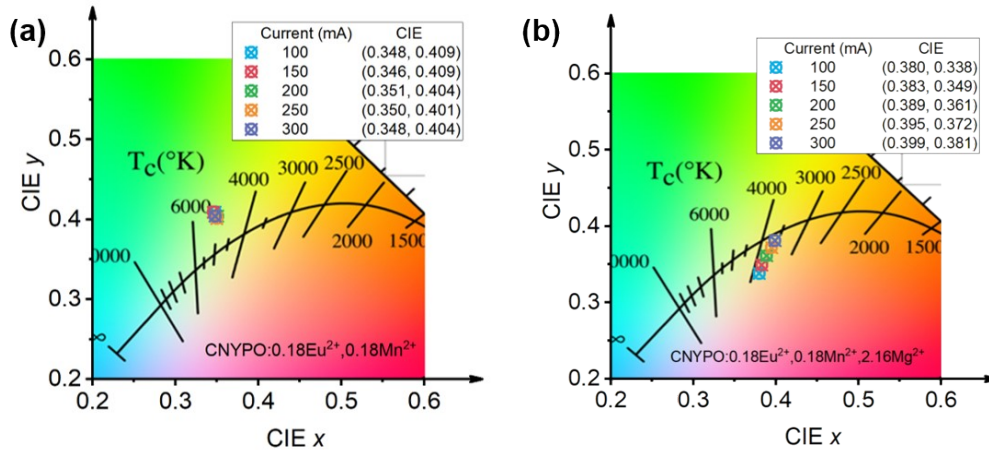

**Fig. S10** CIE coordinates of the LED devices fabricated by (a) CNYPO:0.18Eu<sup>2+</sup>,0.18Mn<sup>2+</sup> and (b) CNYPO:0.18Eu<sup>2+</sup>,0.18Mn<sup>2+</sup>,2.16Mg<sup>2+</sup> with 365 nm chips, respectively.

The EL spectra and CIE coordinates of as-prepared devices are shown in Fig. S9 and S10, respectively. It can be seen that the shape and peak position of the EL spectra have little variation for the device fabricated by CNYPO:0.18Eu<sup>2+</sup>,0.18Mn<sup>2+</sup>, and the CIE coordinates of that indicate a stable emission colour under various currents. For the device fabricated by CNYPO:0.18Eu<sup>2+</sup>,0.18Mn<sup>2+</sup>,2.16Mg<sup>2+</sup>, the emission intensity of red component enhances as the current increases, and the CIE coordinates of the device shift slightly within the warm white light region. In general, the shape of spectra and emission color of the devices are stable under different currents.

## References

- 1 X. Zhang, J. Su, X. Yan, Y. Liao, Z.-c. Wu and C. Zhou, Concentration quenching and thermal stability of  $\text{Eu}^{2+}$  emission in green emitting phosphor  $\text{Li}_2\text{BaSiO}_4: \text{Eu}^{2+}$ , *Solid State Sci.*, 2020, **99**, 106050.
- 2 G. Blasse., Luminescence of inorganic solids: From isolated centres to concentrated systems, *Prog. Solid St. Chem.*, 1988, **18**, 79-171.
- 3 D. L. Dexter, A Theory of Sensitized Luminescence in Solids, *J. Chem. Phys.*, 1953, **21**, 836-850.
- 4 R. Zhou, C. Liu, L.Lin, Y. Huang and H. Liang, *Chem. eng. J.*, 2019, **369**, 376-385.
- 5 R. Zhou, F. Ma, F. Su, Y. Ou, Z. Qi, J. Zahng, Y. Huang, P. Dorenbos and H. Liang, *Inorg. Chem.*, 2020, **59**, 17421-17429.
